# Supplementary material
Source: PubMed Central journal article supplement (PMC8424524)
Supplement: jamainternmed-e214826-s001.pdf [file jamainternmed-e214826-s001.pdf]

## Supplemental Online Content

Kim MS, Cai J, Maniar A, et al. Comparison of classification of indications for allogeneic and autologous transplant for adults in ASTCT guidelines and evidence available in published literature. *JAMA Intern Med*. Published online September 7, 2021.  
doi:10.1001/jamainternmed.2021.4826

**eTable 1.** MeSH terms and subheadings in Ovid MEDLINE search

**eTable 2.** Search terms in Google Scholar search

This supplemental material has been provided by the authors to give readers additional information about their work.

Supplement Table 1. MeSH terms and subheadings in Ovid MEDLINE search

| MeSH terms            | Subheadings                                                                                                                                                                                                                                                                                                                                                                                                                                                                                                                               |
|-----------------------|-------------------------------------------------------------------------------------------------------------------------------------------------------------------------------------------------------------------------------------------------------------------------------------------------------------------------------------------------------------------------------------------------------------------------------------------------------------------------------------------------------------------------------------------|
| Leukemia              |                                                                                                                                                                                                                                                                                                                                                                                                                                                                                                                                           |
| Leukemia, Hairy Cell  |                                                                                                                                                                                                                                                                                                                                                                                                                                                                                                                                           |
| Leukemia, Lymphoid    | Leukemia, B-Cell<br>Leukemia, Lymphocytic, Chronic, B-Cell<br>Leukemia, Prolymphocytic, B-Cell<br>Leukemia, Biphenotypic, Acute<br>Leukemia, Prolymphocytic<br>Leukemia, Prolymphocytic, B-Cell<br>Leukemia, Prolymphocytic, T-Cell<br>Leukemia, T-Cell<br>Leukemia, Large Granular Lymphocytic<br>Leukemia, Prolymphocytic, T-Cell<br>Leukemia-Lymphoma, Adult T-Cell<br>Precursor Cell Lymphoblastic Leukemia-Lymphoma<br>Precursor B-Cell Lymphoblastic Leukemia-Lymphoma<br>Precursor T-Cell Lymphoblastic Leukemia-Lymphoma          |
| Leukemia, Mast-Cell   |                                                                                                                                                                                                                                                                                                                                                                                                                                                                                                                                           |
| Leukemia, Myeloid     | Leukemia, Myelogenous, Chronic, BCR-ABL Positive<br>Blast Crisis<br>Leukemia, Myeloid, Accelerated Phase<br>Leukemia, Myeloid, Chronic-Phase<br>Leukemia, Myeloid, Acute<br>Leukemia, Basophilic, Acute<br>Leukemia, Eosinophilic, Acute<br>Leukemia, Erythroblastic, Acute<br>Leukemia, Mast-Cell<br>Leukemia, Megakaryoblastic, Acute<br>Leukemia, Monocytic, Acute<br>Leukemia, Promyelocytic, Acute<br>Leukemia, Myeloid, Chronic, Atypical, BCR-ABL Negative<br>Leukemia, Myelomonocytic, Acute<br>Leukemia, Myelomonocytic, Chronic |
| Leukemia, Plasma Cell |                                                                                                                                                                                                                                                                                                                                                                                                                                                                                                                                           |
| Lymphoma              |                                                                                                                                                                                                                                                                                                                                                                                                                                                                                                                                           |
| Hodgkin Disease       |                                                                                                                                                                                                                                                                                                                                                                                                                                                                                                                                           |
| Lymphoma, Non-Hodgkin | Lymphoma, B-Cell<br>Burkitt Lymphoma<br>Lymphoma, B-Cell, Marginal Zone<br>Lymphoma, Large B-Cell, Diffuse<br>Plasmablastic Lymphoma<br>Lymphoma, Follicular<br>Lymphoma, Large-Cell, Immunoblastic<br>Lymphoma, Mantle-Cell<br>Lymphoma, T-Cell<br>Enteropathy-Associated T-Cell Lymphoma                                                                                                                                                                                                                                                |

|  |                                                                                                                                                        |
|--|--------------------------------------------------------------------------------------------------------------------------------------------------------|
|  | Lymphoma, Extranodal NK-T-Cell<br>Lymphoma, Large-Cell, Anaplastic<br>Lymphoma, T-Cell, Cutaneous<br>Mycosis Fungoides<br>Lymphoma, T-Cell, Peripheral |
|--|--------------------------------------------------------------------------------------------------------------------------------------------------------|

Supplement Table 2. Search terms in Google Scholar search

| Search number | Search term                                                  |
|---------------|--------------------------------------------------------------|
| 1             | Acute myeloid leukemia AND transplantation                   |
| 2             | Acute promyelocytic leukemia AND transplantation             |
| 3             | Acute lymphoblastic leukemia AND transplantation             |
| 4             | Chronic myeloid leukemia AND transplantation                 |
| 5             | Myelodysplastic syndrome AND transplantation                 |
| 6             | Therapy-related acute myeloid leukemia AND transplantation   |
| 7             | Therapy-related myelodysplastic syndrome AND transplantation |
| 8             | Myelofibrosis AND transplantation                            |
| 9             | Myeloproliferative disease AND transplantation               |
| 10            | Multiple myeloma AND transplantation                         |
| 11            | Plasma cell leukemia AND transplantation                     |
| 12            | Amyloid light-chain amyloidosis AND transplantation          |
| 13            | POEMS syndrome AND transplantation                           |
| 14            | Hodgkin lymphoma AND transplantation                         |
| 15            | Diffuse large B cell lymphoma AND transplantation            |
| 16            | Double hit lymphoma AND transplantation                      |
| 17            | Primary CNS lymphoma AND transplantation                     |
| 18            | Follicular lymphoma AND transplantation                      |
| 19            | Mantle cell lymphoma AND transplantation                     |
| 20            | T cell lymphoma AND transplantation                          |
| 21            | Waldenstrom macroglobulinemia AND transplantation            |
| 22            | Burkitt lymphoma AND transplantation                         |
| 23            | Cutaneous T cell lymphoma AND transplantation                |
| 24            | Plasmablastic lymphoma AND transplantation                   |
| 25            | Chronic lymphocytic leukemia AND transplantation             |
| 26            | Hairy cell leukemia AND transplantation                      |
